# Supplementary material for: CMV-IgG pre-allogeneic hematopoietic stem cell transplantation and the risk for CMV reactivation and mortality
Source: PubMed Central journal article supplement (PMC10247370; doi:10.1038/s41409-023-01944-2), 2023-03-03

# Survival curves up to 12 months

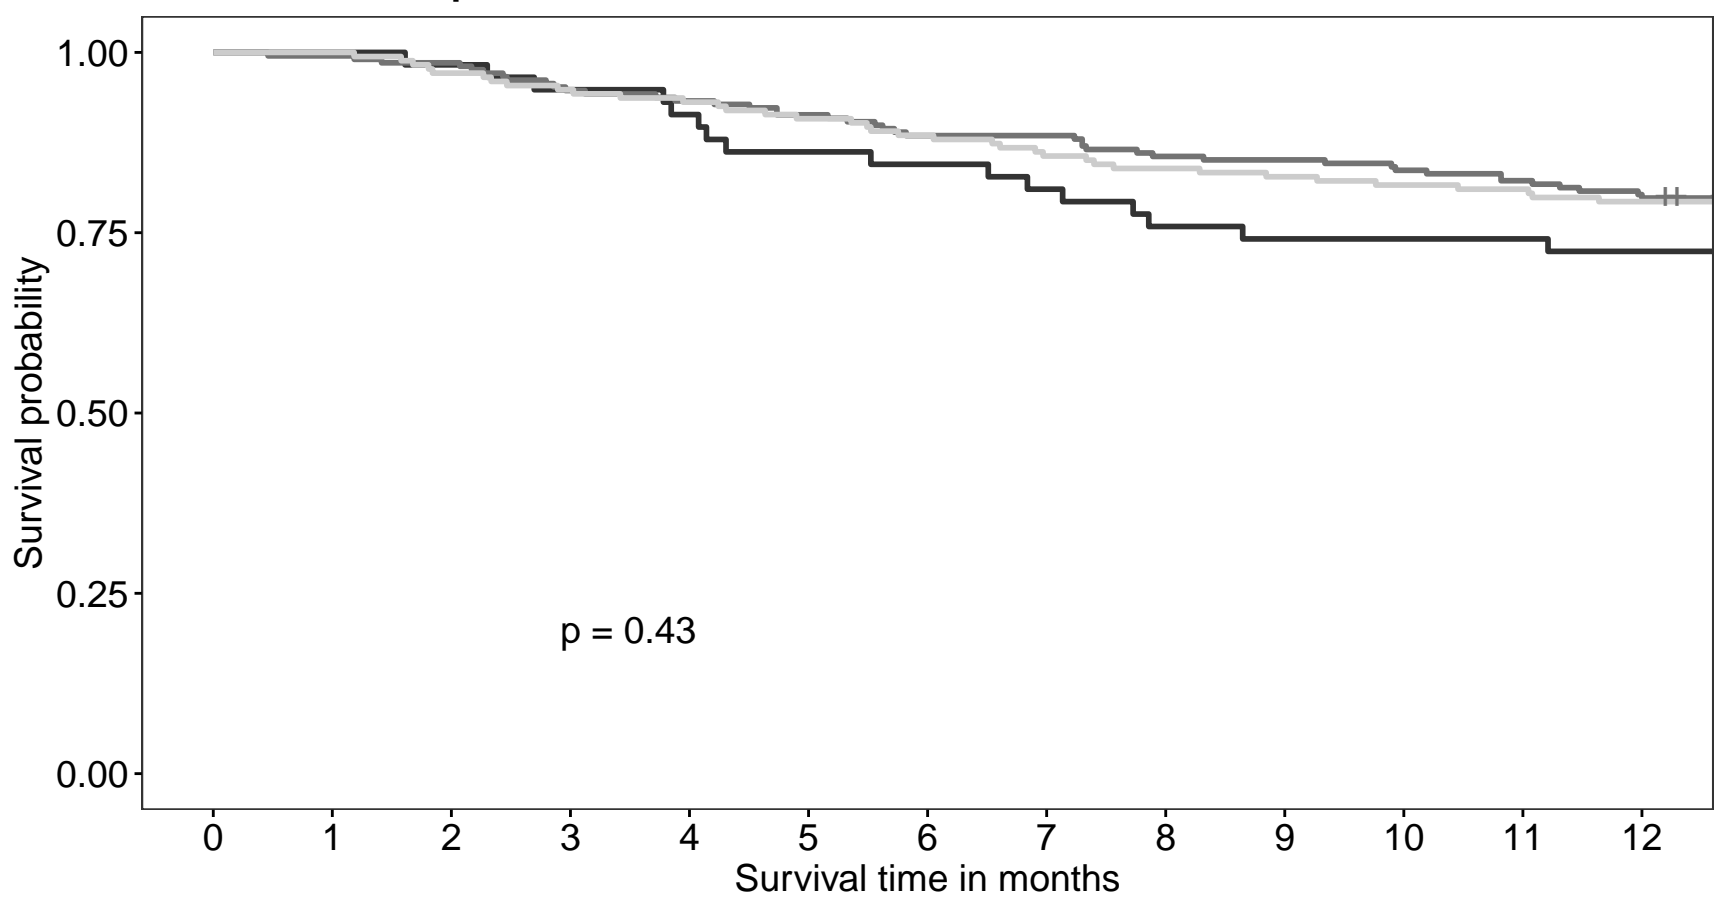

## Strata

- Recipient IgG group A:  
+ ( $\geq 250$  AU/ml):
- Recipient IgG group B:  
+ (6–249 AU/ml):
- Recipient IgG group C:  
+ (0–5 AU/ml):

## Number at risk: n (%)

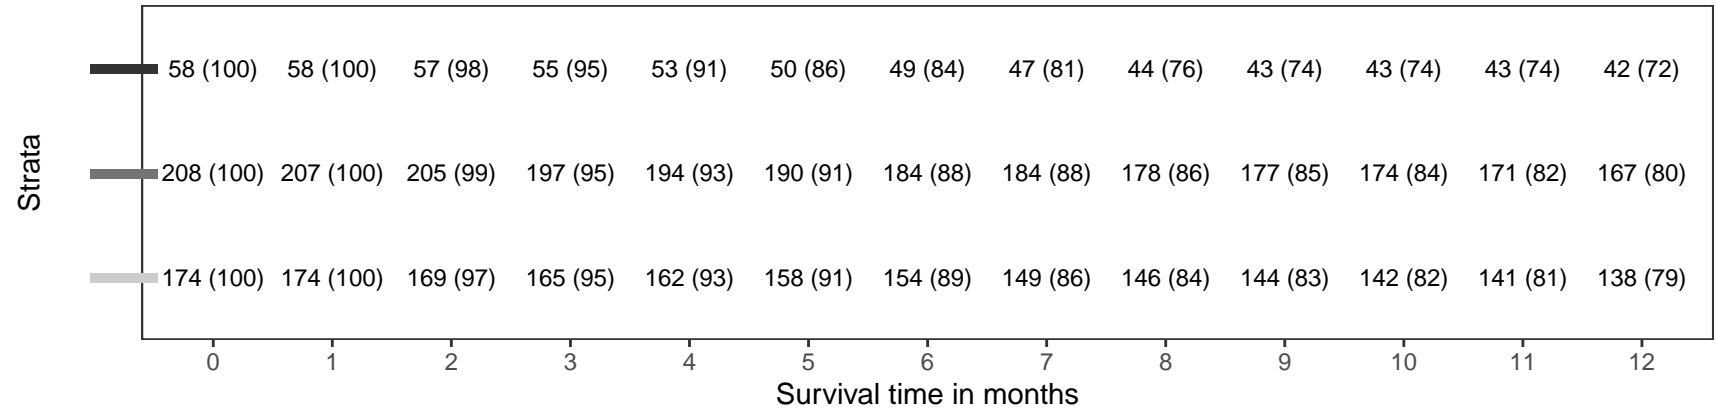

## Number of censoring

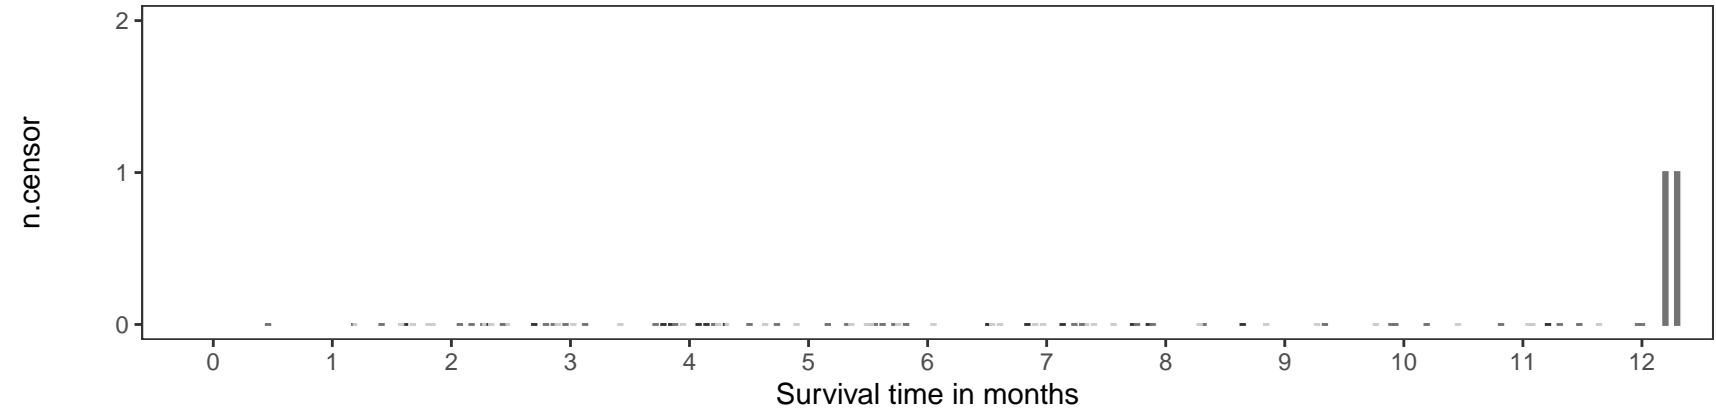

Supplement: 41409_2023_1944_MOESM1_ESM.pdf [file 41409_2023_1944_MOESM1_ESM.pdf]
